# Supplementary material for: Genomic Epidemiology of Carbapenemase-Producing and Colistin-Resistant Enterobacteriaceae among Sepsis Patients in Ethiopia: a Whole-Genome Analysis
Source: PubMed Central journal article supplement (PMC9380574; doi:10.1128/aac.00534-22), 2022-07-25
Supplement: aac.00534-22-s0001.pdf [file aac.00534-22-s0001.pdf]

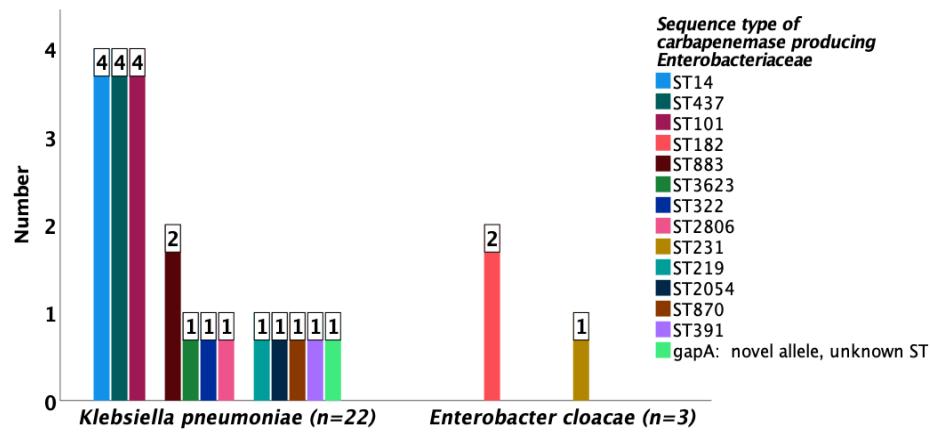

Fig. S1. Sequence type of carbapenemase producing *Enterobacteriaceae* isolated from sepsis patients in Ethiopian referral hospitals.

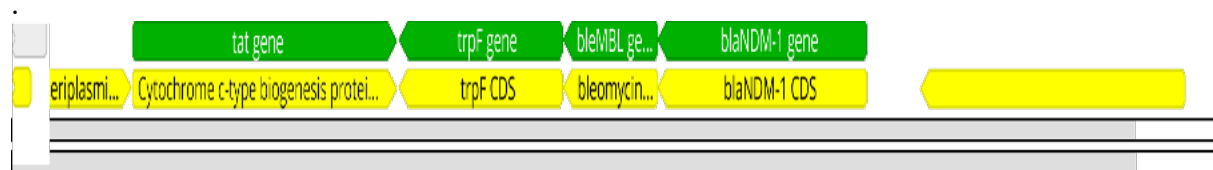

Fig. S2. Plasmid replicon linkage with *bla*<sub>NDM-1</sub> gene which was created using Geneious version 2022.

| Sociodemographic data                                         |                     | Number | Percentage |
|---------------------------------------------------------------|---------------------|--------|------------|
| Hospitals                                                     | TASH                | 501    | 35.4       |
|                                                               | Y12HMC              | 298    | 21         |
|                                                               | DRH                 | 301    | 21.3       |
|                                                               | HUCSH               | 316    | 22.3       |
| Gender                                                        | Male                | 783    | 55.3       |
|                                                               | Female              | 633    | 44.7       |
| Age category                                                  | <29 days            | 586    | 41.4       |
|                                                               | ≥30 days to ≤1 year | 256    | 18.1       |
|                                                               | 1–5 years           | 135    | 9.5        |
|                                                               | 5–18 years          | 158    | 11.2       |
|                                                               | ≥18 years           | 281    | 19.8       |
| Ward                                                          | EOPD                | 104    | 7.3        |
|                                                               | ICU                 | 38     | 2.7        |
|                                                               | Medical ward        | 148    | 10.5       |
|                                                               | NICU                | 596    | 42.1       |
|                                                               | Paediatrics         | 497    | 35.1       |
|                                                               | Surgical ward       | 33     | 2.3        |
| Referral patient*                                             | Yes                 | 722    | 51         |
|                                                               | No                  | 694    | 49         |
| Previous admission                                            | Yes                 | 299    | 21.1       |
|                                                               | No                  | 1117   | 78.9       |
| Hospital stay duration                                        | 1 week              | 828    | 58.5       |
|                                                               | 2 weeks             | 222    | 15.7       |
|                                                               | 3 weeks             | 146    | 10.3       |
|                                                               | 4 weeks and above   | 220    | 15.5       |
| Underlying diseases                                           | Yes                 | 665    | 47         |
|                                                               | No                  | 751    | 53         |
| Previous antibiotic treatment before recruitment to the study | Yes                 | 440    | 31.1       |
|                                                               | No                  | 976    | 68.9       |
| Fever                                                         | Up to 3 days        | 687    | 64.4       |
|                                                               | 4–6 days            | 207    | 19.4       |
|                                                               | 7 days and above    | 173    | 16.2       |
|                                                               | No                  | 349    | 24.6       |
|                                                               | Total               | 1416   | 100        |

Table S1. Sociodemographic data of patients investigated for sepsis at four different hospitals in Ethiopia.

*TASH – Tikur Anbessa Specialized Hospital; Y12HMC – Yekatit 12 Specialized Hospital Medical College; DRH – Dessie Referral Hospital, HUCSH – Hawassa University Comprehensive Specialized Hospital; EOPD – emergency outpatient department; ICU –*
